# Supplementary material for: A Novel Heterozygous Intronic Mutation in the FBN1 Gene Contributes to FBN1 RNA Missplicing Events in the Marfan Syndrome
Source: Hindawi journal article supplement (doi:10.1155/2018/3536495), 2018-05-29
Supplement: f1 [file 3536495.f1.pdf]

**Supp. Table S1.** Classifying the *FBN1* c.2678-15C>A variant as pathogenic

| Type of evidence | Criteria                                                                               | Evidence of pathogenicity | Evidence code |
|------------------|----------------------------------------------------------------------------------------|---------------------------|---------------|
| Population data  | Absent in population databases                                                         | moderate                  | PM2           |
| Predictive data  | Predicted null variant in a gene where LOF is a known mechanism of disease             | very strong               | PVS1          |
| Predictive data  | Computational evidence support a deleterious effect on the gene product                | supporting                | PP3           |
| Functional data  | <i>In vitro</i> functional studies supportive of a damaging effect on the gene product | strong                    | PS3           |
| Other data       | Patient's phenotype is highly specific for a disease with a single genetic etiology    | supporting                | PP4           |

LOF - loss of function; PM - pathogenic moderate; PVS - pathogenic very strong; PP - pathogenic supporting; PS - pathogenic strong. A variant is considered pathogenic if the following criteria are met: 1 PVS1 +  $\geq 1$  Strong (PS1–PS4) or 1 PVS1 + 1 Moderate (PM1–PM6) and 1 supporting (PP1–PP5) or 1 PVS1 +  $\geq 2$  Supporting (PP1–PP5), according to Richards et al., 2015 [20].

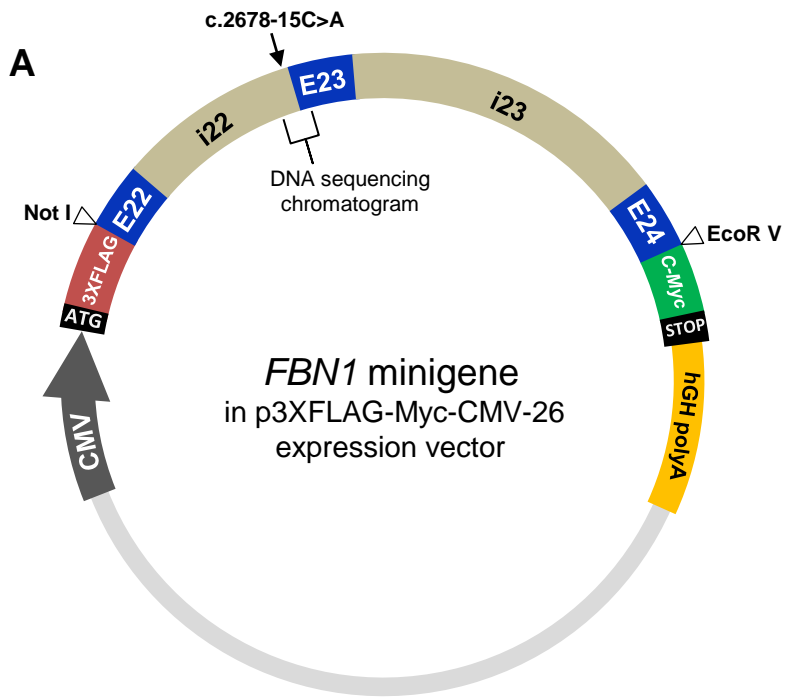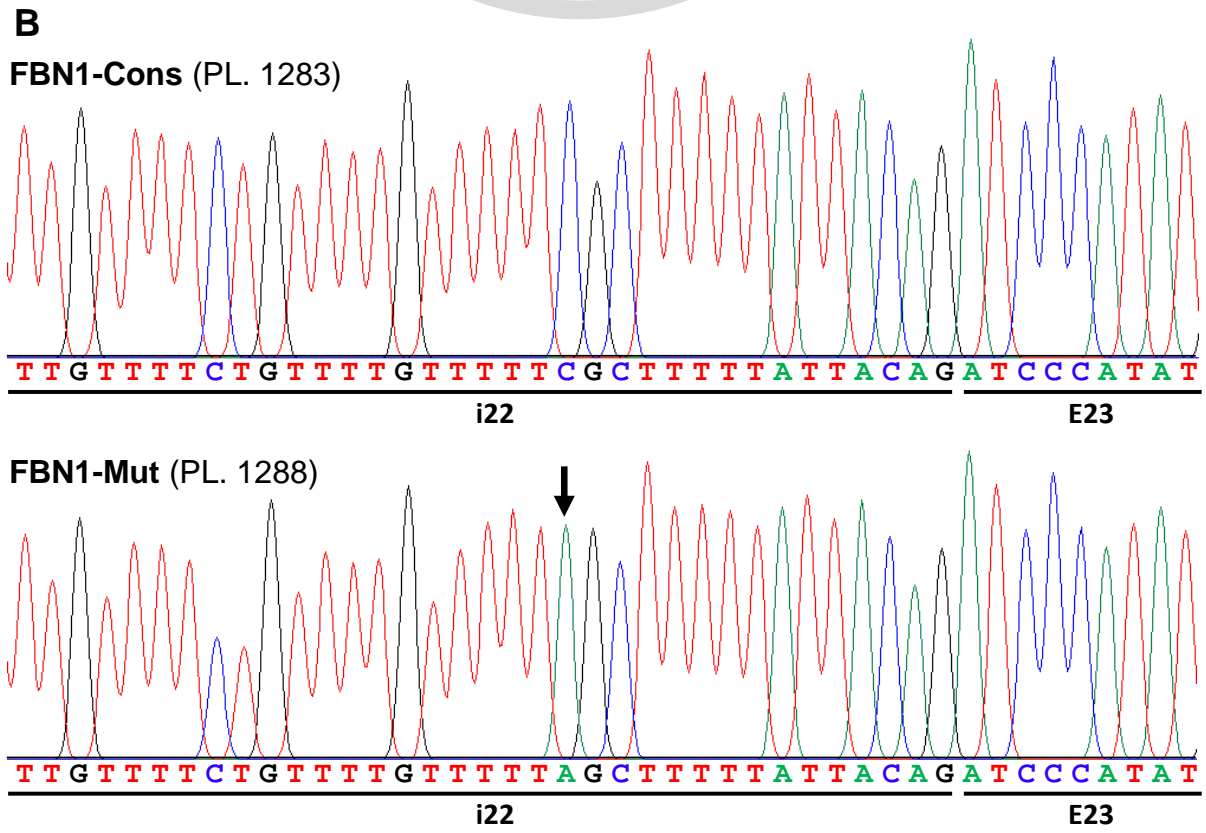

**Fig. S1**

**A**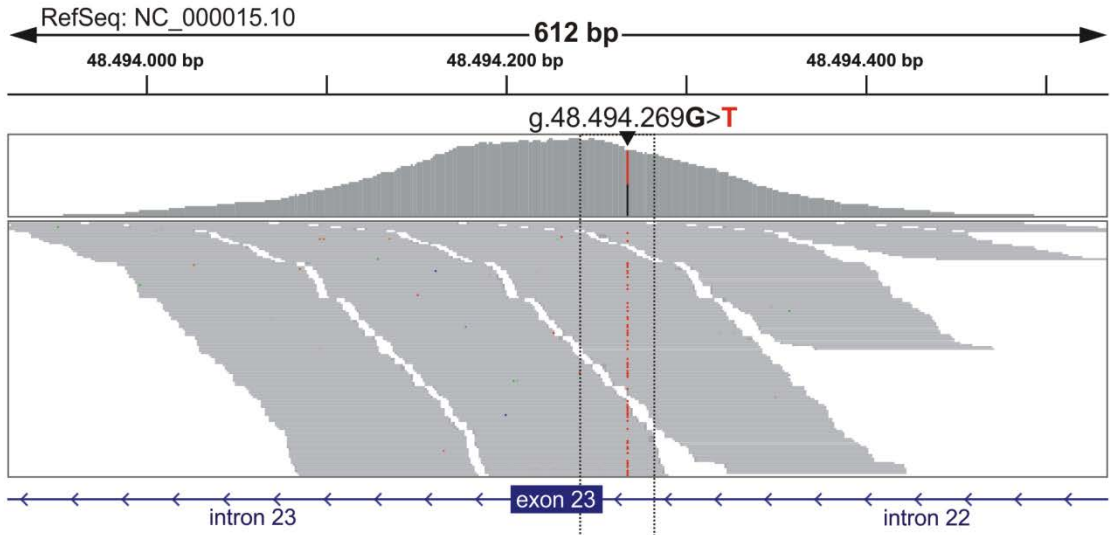**B**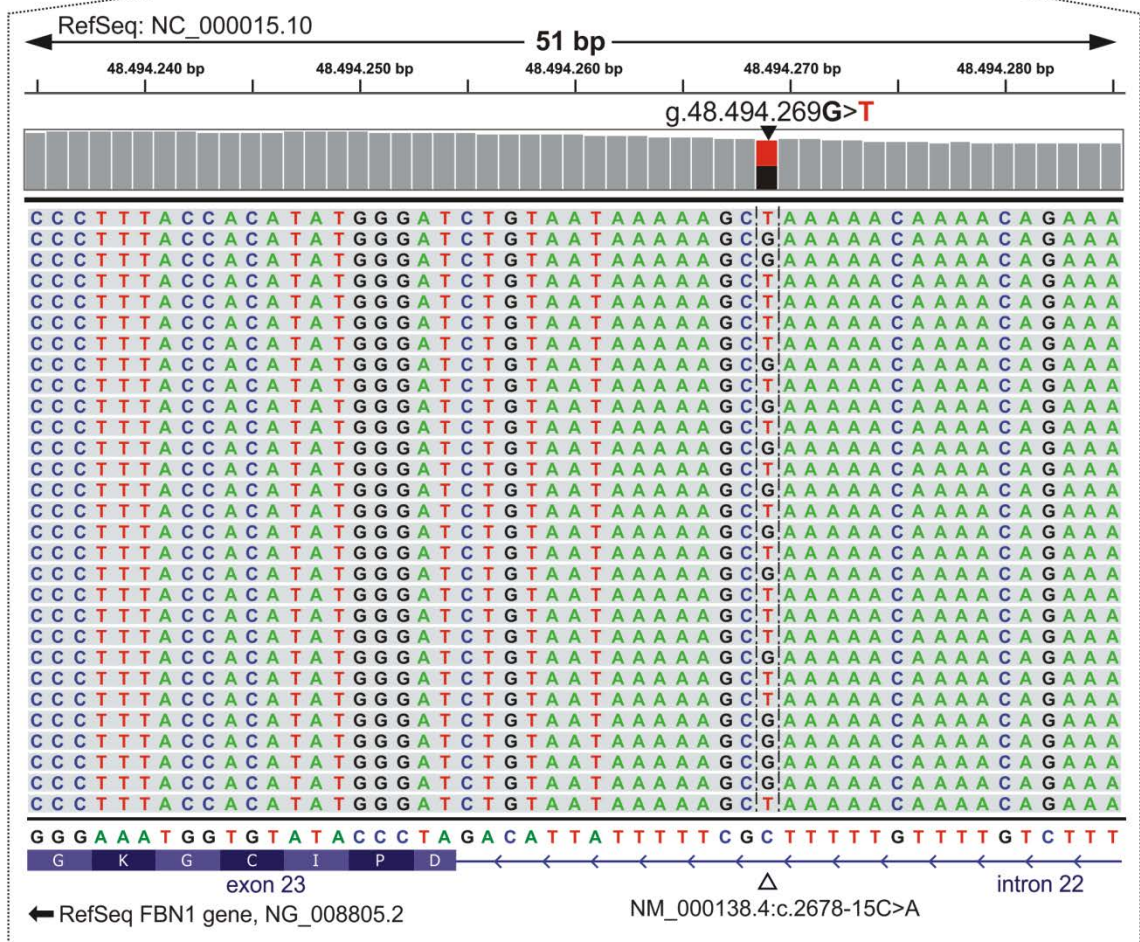**Fig. S2**

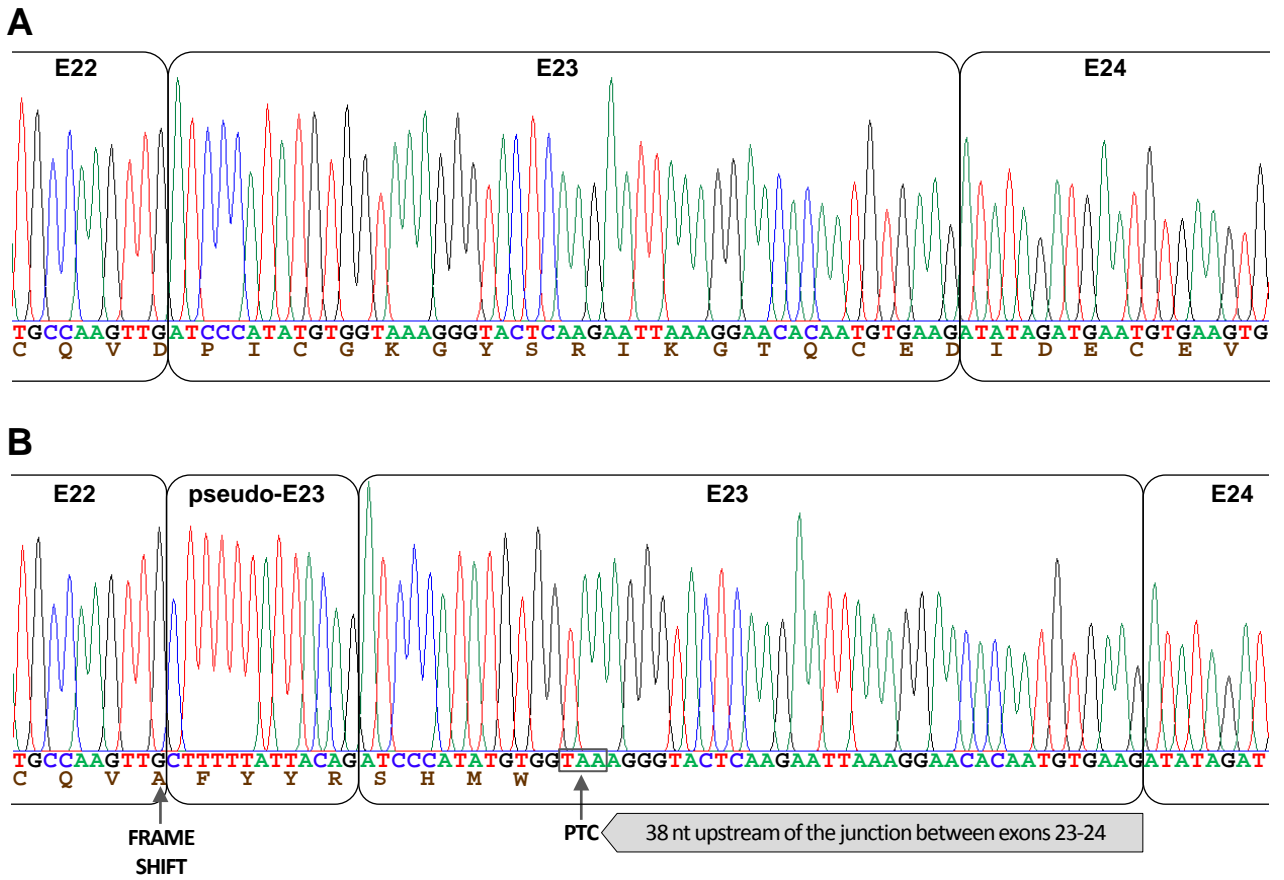

**Fig. S3**
